# Supplementary material for: Prop3D: A flexible, Python-based platform for machine learning with protein structural properties and biophysical data
Source: Springer Nature journal article supplement (doi:10.1186/s12859-023-05586-5), 2024-01-04
Supplement: 12859_2023_5586_MOESM1_ESM.pdf [file 12859_2023_5586_MOESM1_ESM.pdf]

Supplemental Material for  
*Prop3D: A Flexible, Python-based Platform for Machine Learning  
with Protein Structural Properties and Biophysical Data*

Eli J. Draizen<sup>1,2\*</sup>, John Readey<sup>3</sup>, Cameron Mura<sup>1,2\*</sup>, and Philip E. Bourne<sup>1,2</sup>

<sup>1</sup>Department of Biomedical Engineering,

<sup>2</sup>School of Data Science, University of Virginia, Charlottesville, VA, USA

<sup>3</sup>The HDF Group, Bellevue, WA, USA

\*Corresponding Authors: E-mail: e.draizen@gmail.com, cmura@virginia.edu

doi:xx.xxxx/xxxx.x.xx.xxxxxxx

September 15, 2023

## Contents

|          |                                                                      |          |
|----------|----------------------------------------------------------------------|----------|
| <b>1</b> | <b>Sequence-based bioinformatics tools available in Prop3D</b>       | <b>2</b> |
| <b>2</b> | <b>Structural bioinformatics software suites available in Prop3D</b> | <b>3</b> |
| <b>3</b> | <b>How Prop3D abides by the FAIR guidelines</b>                      | <b>4</b> |

# 1 Sequence-based bioinformatics tools available in Prop3D

| Name                | Description                                                                                                                                                                                     | Wikidata entry             |
|---------------------|-------------------------------------------------------------------------------------------------------------------------------------------------------------------------------------------------|----------------------------|
| <b>BLAST</b>        | Search sequences (or groups of sequences) against the non-redundant (NR) database or a custom database                                                                                          | <a href="#">Q286820</a>    |
| <b>DeepSequence</b> | A generative latent variable model for biological sequence families                                                                                                                             | <a href="#">Q114841036</a> |
| <b>ESM</b>          | Pre-trained language models for proteins                                                                                                                                                        | <a href="#">Q114841163</a> |
| <b>EVcouplings</b>  | Evolutionary couplings from protein and RNA sequence alignments                                                                                                                                 | <a href="#">Q114841016</a> |
| <b>HMMER</b>        | Build HMMER models with a group of sequences or at a given level of the CATH hierarchy, search a a group of sequences with a pretrained model, or use jackhmmer starting from a single sequence | <a href="#">Q5631078</a>   |
| <b>MMSeqs2</b>      | Ultra-fast and sensitive search and clustering suite                                                                                                                                            | <a href="#">Q114840759</a> |
| <b>MUSCLE</b>       | MUltiple Sequence Comparison by Log-Expectation (state-of-the-art tool for creating MSAs)                                                                                                       | <a href="#">Q6719088</a>   |
| <b>SeqDesign</b>    | Protein design and variant prediction using autoregressive generative models                                                                                                                    | <a href="#">Q114841058</a> |
| <b>USEARCH</b>      | High-throughput sequence search and clustering analysis tool                                                                                                                                    | <a href="#">Q114841186</a> |

Table 1: **Sequence-based bioinformatics tools available in Prop3D**. Most of these tools have been dockerized, and are available at our Docker Hub (<https://hub.docker.com/u/edraizen>).

## 2 Structural bioinformatics software suites available in Prop3D

| Name               | Description/purpose (in this context)                                                                                                                              | Wikidata entry |
|--------------------|--------------------------------------------------------------------------------------------------------------------------------------------------------------------|----------------|
| <b>APBS</b>        | Adaptive Poisson-Boltzmann Solver, used here to calculate the electrostatic potential for each atom in a given protein                                             | Q65072984      |
| <b>Consurf</b>     | Get pre-calculated conservation scores                                                                                                                             | Q112888886     |
| <b>CNS</b>         | Energy minimize a given structure                                                                                                                                  | Q5191443       |
| <b>CX</b>          | Get curvature for each atom in a given protein                                                                                                                     | Q114841750     |
| <b>DSSP</b>        | Calculate secondary structure and accessibility for each residue in a given structure                                                                              | Q5206192       |
| <b>EPPIC</b>       | Calculate sequence conservation scores for a given protein and obtain biologically relevant protein interactions (i.e., not resulting from crystal packing)        | Q114841783     |
| <b>foldseek</b>    | Fast searching and clustering of protein structure databases                                                                                                       | Q114840749     |
| <b>FreeSASA</b>    | Get solvent accessibility of each atom in a given protein                                                                                                          | Q114841793     |
| <b>Geometricus</b> | A structure-based, alignment-free embedding approach for proteins, utilizing moment invariants                                                                     | Q114840743     |
| <b>HADDOCK</b>     | Dock two proteins or refine the conformation of two docked proteins                                                                                                | Q114841798     |
| <b>MaxCluster</b>  | Cluster very similar structures                                                                                                                                    | Q114840623     |
| <b>MGLTools</b>    | Convert atom names to AutoDock names and PDBQT                                                                                                                     | Q114840701     |
| <b>MM-Align</b>    | Align two protein complexes                                                                                                                                        | Q114841843     |
| <b>mTM-Align</b>   | Multiple structure alignment                                                                                                                                       | Q114841813     |
| <b>MODELLER</b>    | Create full atom structures from C <sub>α</sub> only models, mutate structures with different amino acids, ‘remodel structure’ to energy minimize, and model loops | Q3859815       |
| <b>MSMS</b>        | Calculate molecular surfaces and create meshes                                                                                                                     | Q114841806     |
| <b>Multivalue</b>  | Merge electrostatic values from multiple atoms, e.g. on a protein surface                                                                                          | Q114840933     |
| <b>OpenBabel</b>   | Convert to PDBQT format for AutoDock atom naming                                                                                                                   | Q612752        |
| <b>PDB2PQR</b>     | Protonate a protein structure, debump hydrogens, energy-minimize, and standardise naming (atomic nomenclature)                                                     | Q62856803      |
| <b>pdb-tools</b>   | A “Swiss army knife of tools” to manipulate PDB files                                                                                                              | Q114840802     |
| <b>PRODIGY</b>     | Predict binding affinities ( $K_D$ ) and “fraction of common contacts” in complexes                                                                                | Q114840854     |
| <b>REDUCE</b>      | Protonate and de-protonate structures                                                                                                                              | Q114840896     |
| <b>SCWRL4</b>      | Correct side-chains using the Dunbrack rotamer library                                                                                                             | Q114840881     |
| <b>TM-Align</b>    | Align two or more protein 3D structures                                                                                                                            | Q114840775     |

Table 2: **Structural bioinformatics software suites available in Prop3D**. Most of these tools have been dockerized, and are available at our Docker Hub (<https://hub.docker.com/u/edraizen>).

### 3 How Prop3D abides by the FAIR guidelines

In general, the creation of scalable, reproducible scientific workflows faces challenges that stem from the sheer volume and heterogeneity of available data-sources and data-types, in addition to potential other factors such as the variable range of computing platforms, architectures and capabilities that one may seek to deploy a workflow across (e.g., multi-core processing on a local workstation, versus a Linux HPC cluster, versus an eScience grid or other highly distributed network environment in the cloud). The ‘FAIR’ principles for scientific data provide a set of best-practices that contribute to the research enterprise by striving to make datasets *Findable*, *Accessible*, *Interoperable*, and *Reproducible*. In other words, FAIR datasets should be (i) easy to *find*, with appropriate metadata to facilitate searching by others; (ii) one should be able to *access* all of the data easily, without undue effort; (iii) one should be able to integrate and otherwise *interoperate* the data with other data-sources and software frameworks; and (iv) the data should be (re)usable and *replicable* by others (a bedrock of the scientific method). When possible, these guidelines (<https://www.go-fair.org/fair-principles>) would apply equally well to both the datasets themselves as well as to the code that underlies the data-generating and data-processing/analysis/reduction pipelines—i.e., the software framework would be FAIR-compliant, insofar as its resultant data are FAIR. The following enumerates how Prop3D complies with these guidelines:

#### 1. Findable

The first step in (re)using data is to be able to find it. Metadata and data should be easy to find for both humans and computers. Machine-readable metadata are essential for automated discovery of datasets and services, so this is an essential component of the FAIRification process. In Prop3D, the following hold:

- F1. (Meta)data are assigned a globally unique and persistent identifier
- F2. Data are described with rich metadata (defined by R1 below)
- F3. Metadata clearly and explicitly include the identifier of the data they describe
- F4. (Meta)data are registered or indexed in a searchable resource

#### 2. Accessible

Once a user finds the required data, she/he/they need to know how such data can be accessed, possibly including issues of authentication and authorisation. In Prop3D,

- A1. (Meta)data are retrievable by their identifier using a standardised communications protocol
  - A1.1 The protocol is open, free, and universally implementable
  - A1.2 The protocol allows for an authentication and authorisation procedure, where necessary
- A2. Metadata are accessible, even when the underlying data are no longer available

#### 3. Interoperable

Datasets generally are not used in a vacuum, and at some point or another will need to be integrated with other types and sources of data. In addition, the data need to interoperate with available applications or workflows for analysis, storage, and processing. In Prop3D,

- I1. (Meta)data use a formal, accessible, shared, and broadly applicable language for knowledge representation.
- I2. (Meta)data use vocabularies that follow FAIR principles
- I3. (Meta)data include qualified references to other (meta)data

#### 4. Reusable

The ultimate goal of FAIR is to optimise the reuse of data. To achieve this, metadata and data should be well-described so that they can be replicated and/or combined in different settings. In Prop3D,

- R1. (Meta)data are richly described with a plurality of accurate and relevant attributes
  - R1.1. (Meta)data are released with a clear and accessible data usage license
  - R1.2. (Meta)data are associated with detailed provenance
  - R1.3. (Meta)data meet domain-relevant community standards
